# Supplementary material
Source: PubMed Central journal article supplement (PMC4560040)

**A**gated: CD45.2<sup>+</sup>, CD11b<sup>+</sup>, CD64<sup>+</sup>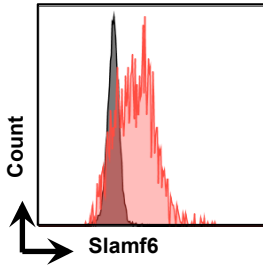

6 Days of infection

**B**gated: CD45<sup>+</sup> colon LP cells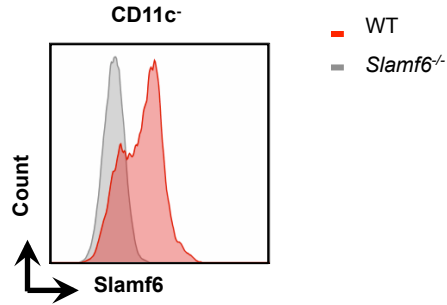

6 Days of infection

— WT  
— *Slamf6*<sup>-/-</sup>

**C**gated: CD45.2<sup>+</sup>, CD90.2<sup>+</sup>, CD127<sup>+</sup>, RORγt<sup>+</sup>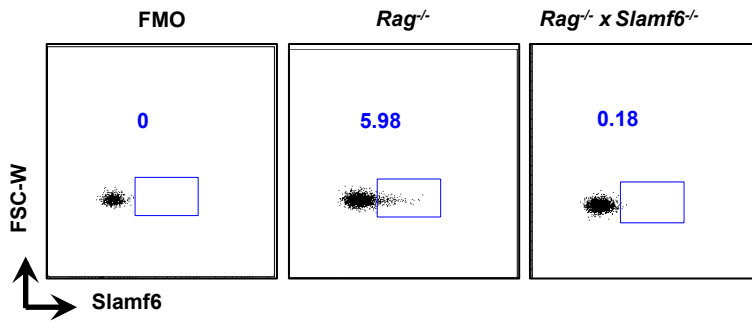

Supplement: supp_dxv029_SupplementalFigureS1.pdf [file supp_dxv029_SupplementalFigureS1.pdf]
